# Supplementary material for: Shared and specific signatures of locomotor ataxia in mutant mice
Source: eLife. 2020 Jul 28;9:e55356. doi: 10.7554/eLife.55356 (PMC7386913; doi:10.7554/eLife.55356)
Supplement: Supplementary file 1. — To test the differences, or not, between genotypes (reelers and control) across speeds we used an independent samples t-test and mixed-effects models (Bates et al., 2013). In this table, we report F statistics from mixed ANOVAs with Satterthwaite degrees of freedom correction. Differences were considered significant at *p<0.05, **p<0.01, and ***p<0.001. [file elife-55356-supp1.xlsx]

## Sheet: Sheet1
Supplementary File 1. Related to All Figures. Statistics
Fig	Test	Independent Variable (IV)	Dependent variable	N (mice)	F Stat	DF1	DF2	p value
1D	t-test, ind.	genotype	speed	7, 12				<0.001
1E	mixed anova	speed	str. length	7, 12	4.19	1	90	<0.0001
		genotype			2.16	1	90	0.14
		speed*genotype			11.49	1	90	0.001
1F	mixed anova	speed	cadence	7, 12	72.12	1	90	<0.0001
		genotype			0.7	1	90	0.4
		speed*genotype			0.02	1	90	0.89
1G	mixed anova	speed	stance durat.	7, 12	16.27	1	90	<0.0001
		genotype			2.97	1	90	0.09
		speed*genotype			2.72	1	90	0.1
1H top	mixed anova	speed	inst velocity FR	7, 11	254.83	1	104	<0.0001
		genotype			0.87	1	104	0.35
		speed*genotype			2.73	1	104	0.1
1H bot	mixed anova	speed	inst velocity HR	7, 11	148.28	1	103	<0.0001
		genotype			14.1	1	103	<0.0001
		speed*genotype			0.19	1	103	0.66
1I top	mixed anova	speed	y excursion FR	7, 11	2.1	1	104	0.15
		genotype			21.81	1	104	<0.0001
		speed*genotype			0.94	1	104	0.33
1I bot	mixed anova	speed	y excursion HR	7, 11	4.22	1	103	0.04
		genotype			66.69	1	103	<0.0001
		speed*genotype			0.64	1	103	0.42
1J top	mixed anova	speed	z (mm) FR	7, 11	0.11	1	104	0.11
		genotype			44.52	1	104	<0.0001
		speed*genotype			2.94	1	104	0.09
1J bot	mixed anova	speed	z (mm) HR	7, 11	3.6	1	103	0.06
		genotype			11.9	1	103	<0.0001
		speed x geno.			15.0	1	103	<0.0001
2A	mixed anova	speed	BOS	7, 11	3.7	1	101	0.05
		genotype			0.42	1	101	0.51
		speed x geno.			0.003	1	101	0.95
2B	mixed anova	speed	str. Length	7, 3	17.75	1	52	<0.0001
		genotype			5.23	1	52	0.03
		speed x genotype			4.25	1	52	0.04
2C	mixed anova	speed	cadence	7, 3	159.32	1	52	<0.0001
		genotype			0.01	1	52	0.92
		speed x genotype			1.25	1	52	0.26
2D	mixed anova	speed	stance durat.	7, 3	91.79	1	52	<0.0001
		genotype			0.44	1	52	0.51
		speed x genotype			0.19	1	52	0.66
2E Top	mixed anova	speed	inst velocity FR	7, 3	14.01	1	8	0.0056
		genotype			50.23	1	8	<0.0001
		speed x genotype			4.84	1	8	0.06
2E Bot	mixed anova	speed	inst velocity HR	7, 3	10.84	1	8	0.01
		genotype			6.09	1	8	0.038
		speed x genotype			4.57	1	8	0.06
2F Top	mixed anova	speed	y excursion FR	7, 3	0.53	1	8	0.48
		genotype			4.81	1	8	0.06
		speed x genotype			0.065	1	8	0.8
2F Bot	mixed anova	speed	y excursion HR	7, 3	0.11	1	8	0.74
		genotype			0.042	1	8	0.84
		speed x genotype			0.16	1	8	0.69
2G Top	mixed anova	speed	z (mm) FR	7, 3	1.47	1	8	0.26
		genotype			0.91	1	8	0.37
		speed x genotype			6.91	1	8	0.03
2G Bot	mixed anova	speed	z (mm) HR	7, 3	2.81	1	8	0.13
		genotype			1.98	1	8	0.19
		speed x genotype			2.96	1	8	0.12
2H Bot	mixed anova	speed	CV peak forw. Vel. FR	7, 11	65.2	1	99	<0.0001
		genotype			0.8	1	99	0.39
2H Top	mixed anova	speed	CV peak forw. Vel. HR	7, 11	51.5	1	99	<0.0001
		genotype			13	1	99	<0.0001
2I Top	mixed anova	speed	CV vert. Displac. FR	7, 11	13.3	1	101	<0.0001
		genotype			45.1	1	101	<0.0001
2I Bot	mixed anova	speed	CV vert. Displac. HR	7, 11	28.3	1	101	<0.0001
		genotype			73.3	1	101	<0.0001
3C	mixed anova	speed	%front-hind phase	7, 11	18.8	1	104	<0.0001
		genotype			11.7	1	104	<0.0001
		speed x geno.			4.9	1	104	0.02
3D	mixed anova	speed	%left-right phase	7, 11	0.03	1	104	0.93
		genotype			0.7	1	104	0.41
3E	mixed anova	speed	%3 paw supp.	7, 11	191.1	1	104	<0.0001
		genotype			115.1	1	104	<0.0001
3F	mixed anova	speed	%2 paw supp. other	7, 11	1.6	1	104	0.22
		genotype			28.3	1	104	<0.0001
		speed x geno.			12.2	1	104	<0.0001
3G	mixed anova	speed	%2 paw supp. front	7, 11	0.7	1	101	0.42
		genotype			207	1	101	<0.0001
3H	mixed anova	speed	% double supp. front	7, 11	178.3	1	99	<0.0001
		genotype			71.9	1	99	<0.0001
3I	mixed anova	speed	% double supp. Hind	7, 11	321.1	1	103	<0.0001
		genotype			27.2	1	103	<0.0001
4A	mixed anova	speed	tail y amplit.	7, 11	0.3	1	103	0.56
		genotype			24.8	1	103	<0.0001
		speed x geno.			11.7	1	103	<0.0001
4B	mixed anova	speed	tail phase	7, 11	9.8	1	104	0.002
		genotype			59.2	1	104	<0.0001
4C	mixed anova	speed	tail phase	7, 3	8.5	1	56	0.01
		genotype			1.3	1	56	0.26
4D	mixed anova	speed	nose y amplit.	7, 11	16.9	1	104	<0.0001
		genotype			5.1	1	104	0.03
		speed x geno.			21	1	104	<0.0001
4E	mixed anova	speed	nose phase	7, 11	8.1	1	104	0.015
		genotype			42.1	1	104	<0.0001
4H	mixed anova	speed	body y displacement	7, 11	27.7	1	99	<0.0001
		genotype			1072.5	1	99	<0.0001
